# Supplementary material for: Synaptic transmission and plasticity require AMPA receptor anchoring via its N-terminal domain
Source: eLife journal article supplement (doi:10.7554/elife.23024), 2017-03-14
Supplement: supp [file elife-23024-supp-v2.zip]

Archive with 6 entries (6 files):
- elife_poa_e23024_Figure_8_Figure_Supplement_2.pdf
- elife_poa_e23024_Figure_6_Figure_Supplement_1.pdf
- elife_poa_e23024_Figure_1_Figure_Supplement_1.pdf
- elife_poa_e23024_Figure_7_Figure_Supplement_1.pdf
- elife_poa_e23024_Figure_2_Figure_Supplement_1.pdf
- elife_poa_e23024_Figure_8_Figure_Supplement_1.pdf
