# Supplementary material for: Synaptic transmission and plasticity require AMPA receptor anchoring via its N-terminal domain
Source: eLife journal article supplement (doi:10.7554/elife.23024), 2017-03-14

**Figure 7 - figure supplement 1**

**Somatic Receptors  
(patches)**

**Synaptic Receptors  
(EPSCs)**

**A**

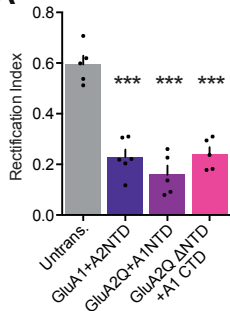

**GluA2Q  
 $\Delta$ NTD  
+A1 CTD**

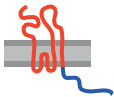

**B1**

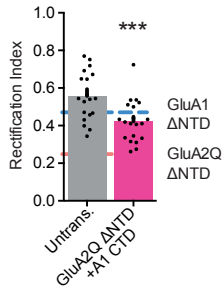

**B2**

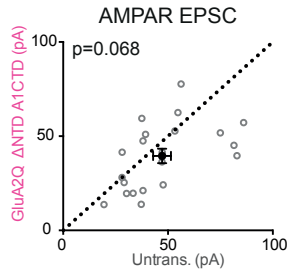

**B3**

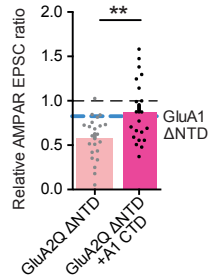

Supplement: supp [file elife-23024-supp-v2.zip › elife_poa_e23024_Figure_7_Figure_Supplement_1.pdf]
