# Supplementary figures and images for: Synaptic transmission and plasticity require AMPA receptor anchoring via its N-terminal domain
Source: eLife journal article supplement (doi:10.7554/elife.23024), 2017-03-14

Figure 8 - figure supplement 2

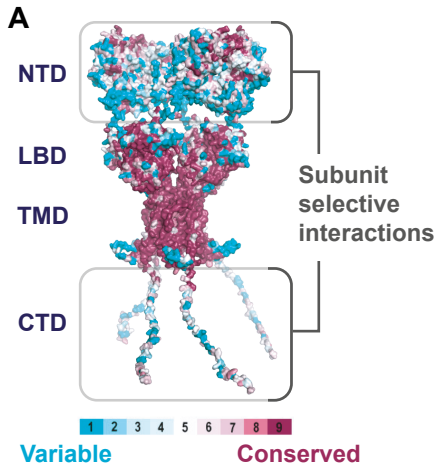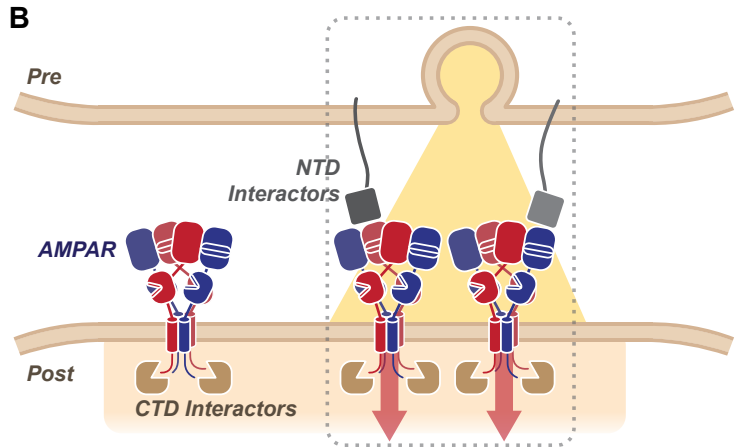

Supplement: supp [file elife-23024-supp-v2.zip › elife_poa_e23024_Figure_8_Figure_Supplement_2.pdf]

# Figure 6 - figure supplement 1

A

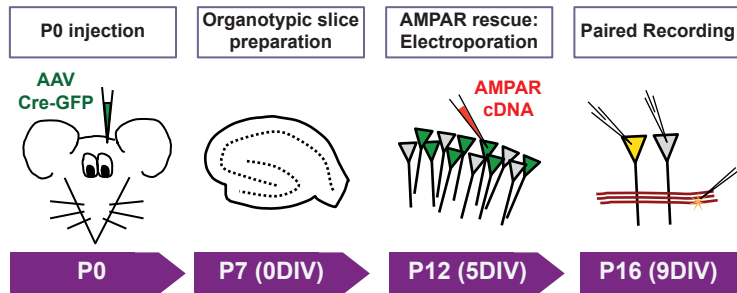

B

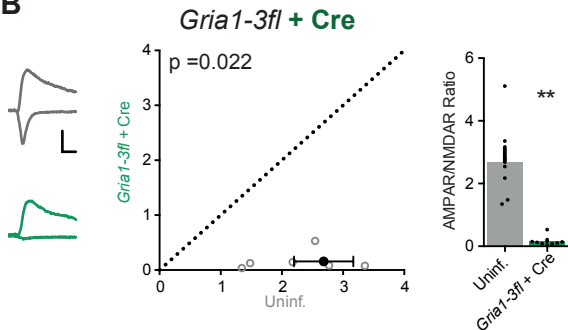

Supplement: supp [file elife-23024-supp-v2.zip › elife_poa_e23024_Figure_6_Figure_Supplement_1.pdf]

Figure 1 - figure supplement 1

A

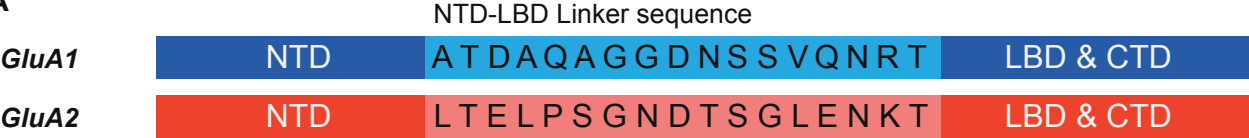

B1

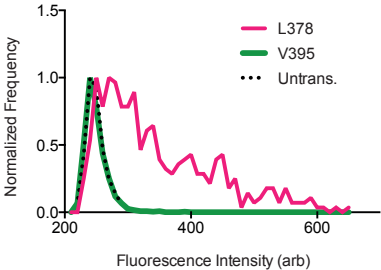

B2

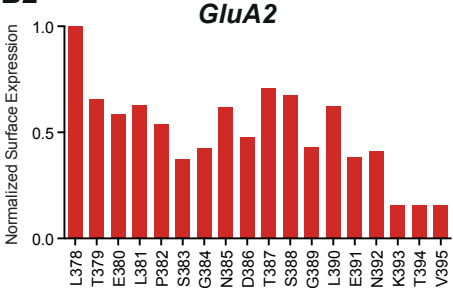

B3

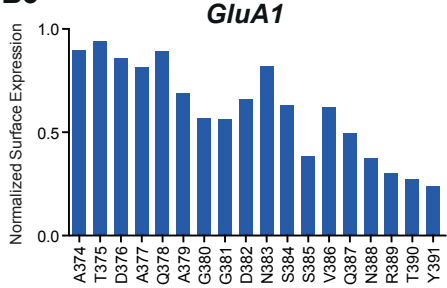

Supplement: supp [file elife-23024-supp-v2.zip › elife_poa_e23024_Figure_1_Figure_Supplement_1.pdf]

**Figure 2 - figure supplement 1**

**A**

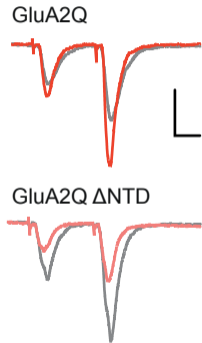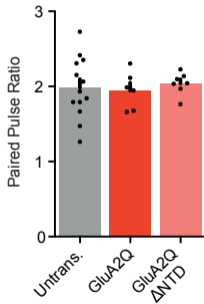

**B**

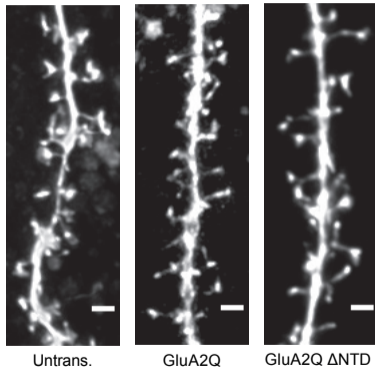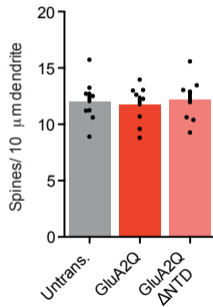

Supplement: supp [file elife-23024-supp-v2.zip › elife_poa_e23024_Figure_2_Figure_Supplement_1.pdf]

**Figure 8 - figure supplement 1**

**A1 tCaMKII**

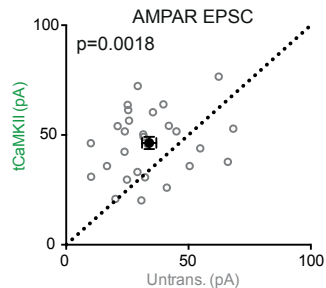

**A2**

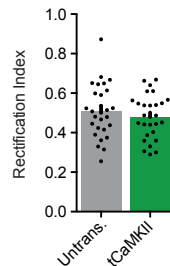

**B1**

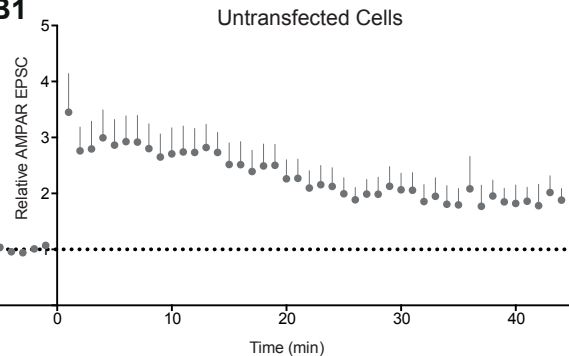

**GFP-GluA2Q**

**C1**

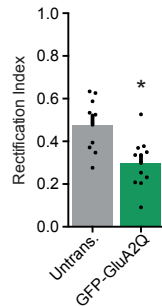

**C2**

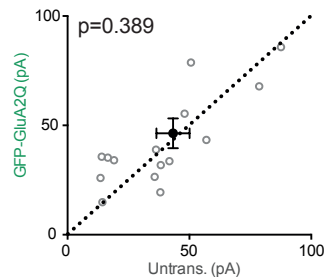

**B2**

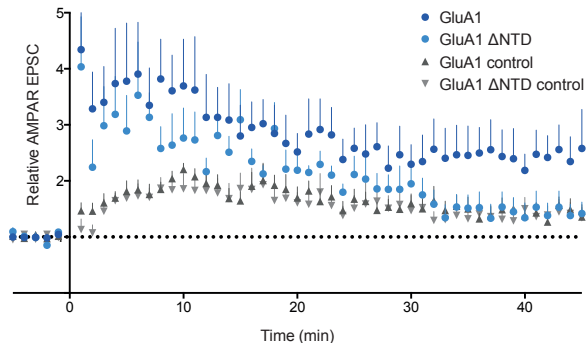

Supplement: supp [file elife-23024-supp-v2.zip › elife_poa_e23024_Figure_8_Figure_Supplement_1.pdf]
